# Supplementary material for: Sialyl-lactotetra, a Novel Cell Surface Marker of Undifferentiated Human Pluripotent Stem Cells
Source: PubMed Central journal article supplement (PMC4081926; doi:10.1074/jbc.m114.568832), 2014-05-19
Supplement: supp_M114.568832_jbc.M114.568832-1.pdf [file supp_M114.568832_jbc.M114.568832-1.pdf]

**Table S1.** Glycosphingolipid structures mentioned in this study

| <b>Trivial name</b>                   | <b>Structure</b>                                                                             |
|---------------------------------------|----------------------------------------------------------------------------------------------|
| <i>I. Non-acid glycosphingolipids</i> |                                                                                              |
| GalCer                                | Gal $\beta$ 1Cer                                                                             |
| GlcCer                                | Glc $\beta$ 1Cer                                                                             |
| LacCer                                | Gal $\beta$ 4Glc $\beta$ 1Cer                                                                |
| Galabia                               | Gal $\alpha$ 4Gal $\beta$ 1Cer                                                               |
| Lactotri                              | GlcNAc $\beta$ 3Gal $\beta$ 4Glc $\beta$ 1Cer                                                |
| Gangliotri/asialoGM2                  | GalNAc $\beta$ 4Gal $\beta$ 4Glc $\beta$ 1Cer                                                |
| Globotri                              | Gal $\alpha$ 4Gal $\beta$ 4Glc $\beta$ 1Cer                                                  |
| Globotetra                            | GalNAc $\beta$ 3Gal $\alpha$ 4Gal $\beta$ 4Glc $\beta$ 1Cer                                  |
| Globopenta/SSEA-3                     | Gal $\beta$ 3GalNAc $\beta$ 3Gal $\alpha$ 4Gal $\beta$ 4Glc $\beta$ 1Cer                     |
| Globo H                               | Fuc $\alpha$ 2Gal $\beta$ 3GalNAc $\beta$ 3Gal $\alpha$ 4Gal $\beta$ 4Glc $\beta$ 1Cer       |
| Lactotetra                            | Gal $\beta$ 3GlcNAc $\beta$ 3Gal $\beta$ 4Glc $\beta$ 1Cer                                   |
| Fucosyl-lactotetra/H type 1 penta     | Fuc $\alpha$ 2Gal $\beta$ 3GlcNAc $\beta$ 3Gal $\beta$ 4Glc $\beta$ 1Cer                     |
| H type 2 penta                        | Fuc $\alpha$ 2Gal $\beta$ 4GlcNAc $\beta$ 3Gal $\beta$ 4Glc $\beta$ 1Cer                     |
| Le <sup>x</sup> penta                 | Gal $\beta$ 4(Fuc $\alpha$ 3)GlcNAc $\beta$ 3Gal $\beta$ 4Glc $\beta$ 1Cer                   |
| Le <sup>y</sup> hexa                  | Fuc $\alpha$ 2Gal $\beta$ 4(Fuc $\alpha$ 3)GlcNAc $\beta$ 3Gal $\beta$ 4Glc $\beta$ 1Cer     |
| A type 1 hexa                         | GalNAc $\alpha$ 3(Fuc $\alpha$ 2)Gal $\beta$ 3GlcNAc $\beta$ 3Gal $\beta$ 4Glc $\beta$ 1Cer  |
| <i>II. Acid glycosphingolipids</i>    |                                                                                              |
| GM3                                   | NeuAc $\alpha$ 3Gal $\beta$ 4Glc $\beta$ 1Cer                                                |
| GM2                                   | GalNAc $\beta$ 4(NeuAc $\alpha$ 3)Gal $\beta$ 4Glc $\beta$ 1Cer                              |
| GM1                                   | Gal $\beta$ 3GalNAc $\beta$ 4(NeuAc $\alpha$ 3)Gal $\beta$ 4Glc $\beta$ 1Cer                 |
| NeuGcGM1                              | Gal $\beta$ 3GalNAc $\beta$ 4(NeuGc $\alpha$ 3)Gal $\beta$ 4Glc $\beta$ 1Cer                 |
| GD3                                   | NeuAc $\alpha$ 8NeuAc $\alpha$ 3Gal $\beta$ 4Glc $\beta$ 1Cer                                |
| GD1a                                  | NeuAc $\alpha$ 3Gal $\beta$ 3GalNAc $\beta$ 4(NeuAc $\alpha$ 3)Gal $\beta$ 4Glc $\beta$ 1Cer |
| GD1b                                  | Gal $\beta$ 3GalNAc $\beta$ 4(NeuAc $\alpha$ 8NeuAc $\alpha$ 3)Gal $\beta$ 4Glc $\beta$ 1Cer |
| Sialyl-Le <sup>a</sup>                | NeuAc $\alpha$ 3Gal $\beta$ 3(Fuc $\alpha$ 4)GlcNAc $\beta$ 3Gal $\beta$ 4Glc $\beta$ 1Cer   |

|                                         |                                                                                                            |
|-----------------------------------------|------------------------------------------------------------------------------------------------------------|
| Sialyl-Le <sup>x</sup>                  | NeuAc $\alpha$ 3Gal $\beta$ 4(Fuc $\alpha$ 3)GlcNAc $\beta$ 3Gal $\beta$ 4Glc $\beta$ 1Cer                 |
| Sialyl-globopenta/SSEA-4                | NeuAc $\alpha$ 3Gal $\beta$ 3GalNAc $\beta$ 3Gal $\alpha$ 4Gal $\beta$ 4Glc $\beta$ 1Cer                   |
| Disialyl-globopenta                     | NeuAc $\alpha$ 3Gal $\beta$ 3(NeuAc $\alpha$ 6)GalNAc $\beta$ 3Gal $\alpha$ 4Gal $\beta$ 4Glc $\beta$ 1Cer |
| Sialyl-lactotetra                       | NeuAc $\alpha$ 3Gal $\beta$ 3GlcNAc $\beta$ 3Gal $\beta$ 4Glc $\beta$ 1Cer                                 |
| Sialyl-neolactotetra                    | NeuAc $\alpha$ 3Gal $\beta$ 4GlcNAc $\beta$ 3Gal $\beta$ 4Glc $\beta$ 1Cer                                 |
| Sialyl-globotetra                       | NeuAc $\alpha$ 3GalNAc $\beta$ 3Gal $\alpha$ 4Gal $\beta$ 4Glc $\beta$ 1Cer                                |
|                                         |                                                                                                            |
| <i>III. Sulfated glycosphingolipids</i> |                                                                                                            |
| Sulfatide                               | SO <sub>3</sub> -3Gal $\beta$ 1Cer                                                                         |
| Sulf-LacCer                             | SO <sub>3</sub> -3Gal $\beta$ 4Glc $\beta$ 1Cer                                                            |
| Sulf-globopenta                         | SO <sub>3</sub> -3Gal $\beta$ 3GalNAc $\beta$ 3Gal $\alpha$ 4Gal $\beta$ 4Glc $\beta$ 1Cer                 |
| HNK-1                                   | SO <sub>3</sub> -3GlcA $\beta$ 3Gal $\beta$ 4GlcNAc $\beta$ 3Gal $\beta$ 4Glc $\beta$ 1Cer                 |
