# Supplementary material for: Sialyl-lactotetra, a Novel Cell Surface Marker of Undifferentiated Human Pluripotent Stem Cells
Source: PubMed Central journal article supplement (PMC4081926; doi:10.1074/jbc.m114.568832), 2014-05-19
Supplement: supp_M114.568832_New_Table_S2.pdf [file supp_M114.568832_New_Table_S2.pdf]

**Table S2.** Monoclonal antibodies used in chromatogram binding assays.

| <u>Antibody</u>                     | <u>Clone/Designation</u> | <u>Manufacturer/Reference</u> | <u>Dilution</u> | <u>Isotype</u> | <u>hESC binding<sup>1</sup></u> |
|-------------------------------------|--------------------------|-------------------------------|-----------------|----------------|---------------------------------|
| Anti-SSEA-4                         | MC-813-70                | eBioScience                   | 1:100           | IgG3           | +                               |
| Anti-sialyl-Lewis <sup>x</sup>      | KM93                     | Merck                         | 1:50            | IgM            | -                               |
| Anti-sialyl-Lewis <sup>a</sup>      | 116-NS-19-9              | Signet                        | 1:30            | IgG1           | -                               |
| Anti-GD1a                           | GD1a-1                   | Millipore                     | 1:100           | IgG1           | -                               |
| Anti-HNK-1                          | VC1.1                    | Sigma                         | 1:50            | IgM            | -                               |
| Anti-SO <sub>3</sub> -3Gal $\beta$  | Sulph-1                  | (1) <sup>2</sup>              | 1:100           | IgG1           | +                               |
| Anti-GM1                            | GM1:1                    | (2)                           | 1:50            | IgM            | -                               |
| Anti-GM2                            | DMAb-1                   | (3)                           | 1:50            | IgM            | -                               |
| Anti-GD3                            | DMAb-7                   | (4)                           | 1:100           | IgM            | -                               |
| Anti-sialyl-lactotetra              | TR4/SL-50                | (5)                           | 1:1000          | IgM            | +                               |
| Anti-di-sialyl-lactotetra           | DMAb22                   | (6)                           | 1:2000          | IgM            | -                               |
| Anti-NeuAc $\alpha$ 3-neolactotetra | LM1:1a                   | (7)                           | 1:1000          | IgM            | -                               |
| Anti-NeuAc $\alpha$ 6-neolactotetra | LM4:2                    | (8)                           | 1:100           | IgG            | -                               |

<sup>1</sup>Binding is defined as follows: + denotes a binding when 40  $\mu$ g of the acid glycosphingolipid fraction of hESC SA181 or SA121 was applied on the thin-layer chromatogram, while - denotes no binding.

<sup>2</sup>References:

1. Fredman, P., Mattson, L., Andersson, K., Davidsson, P., Ishizuka, I., Jeansson, S., Månsson, J.-E., and Svennerholm, L. (1988) Characterization of the binding epitope of a monoclonal antibody to sulphatide. *Biochem. J.* **251**, 17-22
2. Molander, M., Berthold, C.H., Persson, H., Andersson, K., and Fredman, P. (1997) Monosialoganglioside (GM1) immunofluorescence in rat spinal roots studied with a monoclonal antibody. *J. Neurocytol.* **26**, 101-111
3. Karlsson, G., Månsson, J.E., Wikstrand, C., Bigner, D., and Svennerholm, L. (1990) Characterization of the binding epitope of the monoclonal antibody DMAb-1 to ganglioside GM2. *Biochim. Biophys. Acta* **1043**, 267-272
4. He, X., Wikstrand, C.J., Fredman, P., Månsson, J.E., Svennerholm, L., and Bigner, D.D. (1989) GD3 expression by cultured human tumor cells of neuroectodermal origin. *Acta. Neuropathol.* **79**, 317-325
5. Wikstrand, C.J., Longee, D.C., McLendon, R.E., Fuller, G.N., Friedman, H.S., Fredman, P., Svennerholm, L., and Bigner, D.D. (1993) Lactotetraose series ganglioside 3'6'-isoLD1 in tumors of central nervous and other systems *in vitro* and *in vivo*. *Cancer Res.* **53**, 120-126
6. Svennerholm, L., Boström, K., Fredman, P., Månsson, J.-E., Rosengren, B., and Rynmark, B.-M. (1989) Human brain gangliosides: developmental changes from early fetal stage to advanced age. *Biochim. Biophys. Acta* **1005**, 109-117
7. Svennerholm, L., Rynmark, B.M., Vilbersson, G., Fredman, P., Gottfries, J., Månsson, J.-E., and Percy, A. (1991) Gangliosides in human fetal brain. *J. Neurochem.* **56**, 1763-1768
8. Nilsson, O., Lindholm, L., Holmgren, J. and Svennerholm, L. (1985) Monoclonal antibodies raised against NeuAc $\alpha$ 2-6neolactotetraosylceramide detect carcinoma-associated gangliosides. *Biochim. Biophys. Acta* **835**, 577-583
